# Supplementary material for: Relationship between crosslinking and ordering kinetics for the fabrication of soft templated (FDU-16) mesoporous carbon thin films
Source: Royal Society of Chemistry journal article supplement (doi:10.1039/c4ra08316d), 2014-09-10
Supplement: c4ra08316d1.pdf [file c4ra08316d1.pdf]

Electronic supplementary information for

## Relationship between crosslinking and ordering for the fabrication of soft templated (FDU-16) mesoporous carbon thin films

Yuanzhong Zhang, Zhe Qiang, and Bryan D. Vogt

Department of Polymer Engineering, University of Akron, Akron, OH 44325

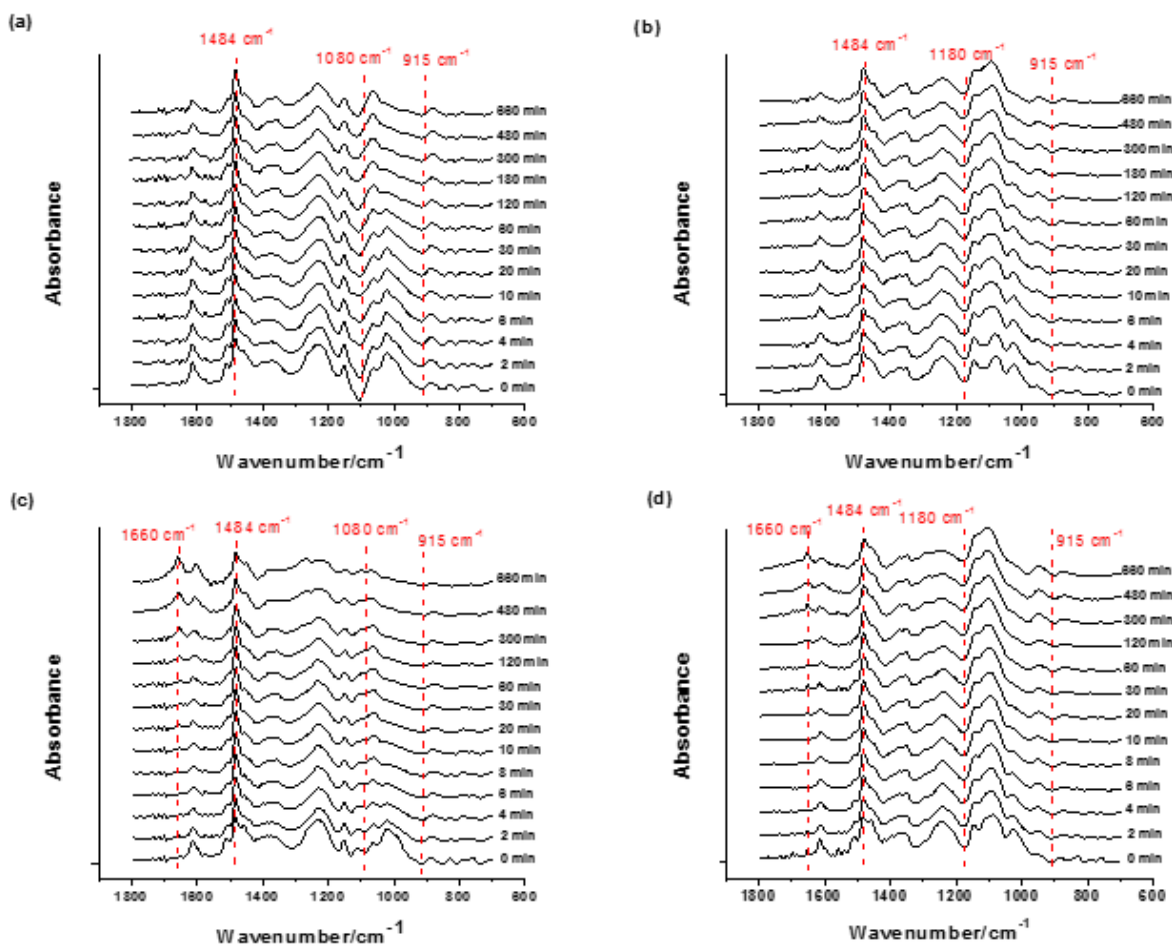

**Figure S1.** Temporal evolution of the FTIR spectra for (a) resol, (b) FDU-16 films at 100 °C and when crosslinking at 140 °C for (c) resol and (d) FDU-16 films.

| <b>Table S1. FTIR bands assignment (Full)</b>                         |                                                                                             |
|-----------------------------------------------------------------------|---------------------------------------------------------------------------------------------|
| <b>Wavenumber of observed peak centers or bands (cm<sup>-1</sup>)</b> | <b>Functional group</b>                                                                     |
| 1740-1590 (doublet)                                                   | C=O substitution on aromatic ring <sup>30</sup>                                             |
| 1625-1590                                                             | aromatic C=C stretching vibration due to asymmetric substitution <sup>30</sup>              |
| 1511                                                                  | aromatic C=C stretching in 1,4 or 1,2,4 substituted benzene ring <sup>30</sup>              |
| 1484                                                                  | aromatic C=C stretching <sup>28</sup>                                                       |
| 1460                                                                  | CH <sub>2</sub> deformation vibration in -CH <sub>2</sub> -OH <sup>30</sup>                 |
| 1410-1310                                                             | COH bending vibration of phenol <sup>30</sup>                                               |
| 1374                                                                  | -CH <sub>2</sub> - symmetric deformation in F127 <sup>31</sup>                              |
| 1360                                                                  | -CH <sub>2</sub> - wag, C-C stretching in F127 <sup>31</sup>                                |
| 1343                                                                  | -CH <sub>2</sub> - wag in F127 <sup>31</sup>                                                |
| 1260-1180                                                             | CO stretching of phenol <sup>30</sup>                                                       |
| 1175-1150                                                             | CO stretching of o- and p- alkyl phenols <sup>30</sup>                                      |
| 1149                                                                  | C-O-C stretching and C-C stretching in F127 <sup>31</sup>                                   |
| 1113                                                                  | C-O-C stretching in F127 <sup>31</sup>                                                      |
| 1070-1050                                                             | C-O-C stretching in both phenolic resin and F127 <sup>31</sup>                              |
| 1028; 1011; 995                                                       | δ(O-H)v(C-O) vibration of 2, 4, 6-trihydroxymethylphenol <sup>29</sup>                      |
| 1020; 996; 990                                                        | δ(O-H)v(C-O) vibration of 2, 4-dihydroxymethylphenol <sup>29</sup>                          |
| 1010                                                                  | δ(O-H)v(C-O) vibration of 2, 6-dihydroxymethylphenol <sup>29</sup>                          |
| 1003; 995                                                             | δ(O-H)v(C-O) vibration in primary alcohol of 2-hydroxymethylphenol <sup>29</sup>            |
| 991                                                                   | δ(O-H)v(C-O) vibration of 4-hydroxymethylphenol <sup>29</sup>                               |
| 963                                                                   | CH <sub>2</sub> rock <sup>31</sup>                                                          |
| 947                                                                   | CH <sub>2</sub> rock and C-O-C stretching <sup>31</sup>                                     |
| 890                                                                   | aromatic =C-H out-of-plane deformation vibration, 2, 4, 6- substituted phenol <sup>30</sup> |
| 830                                                                   | 4- or 2, 4- substituted phenol <sup>30</sup>                                                |
| 756                                                                   | 2- substituted phenol <sup>30</sup>                                                         |

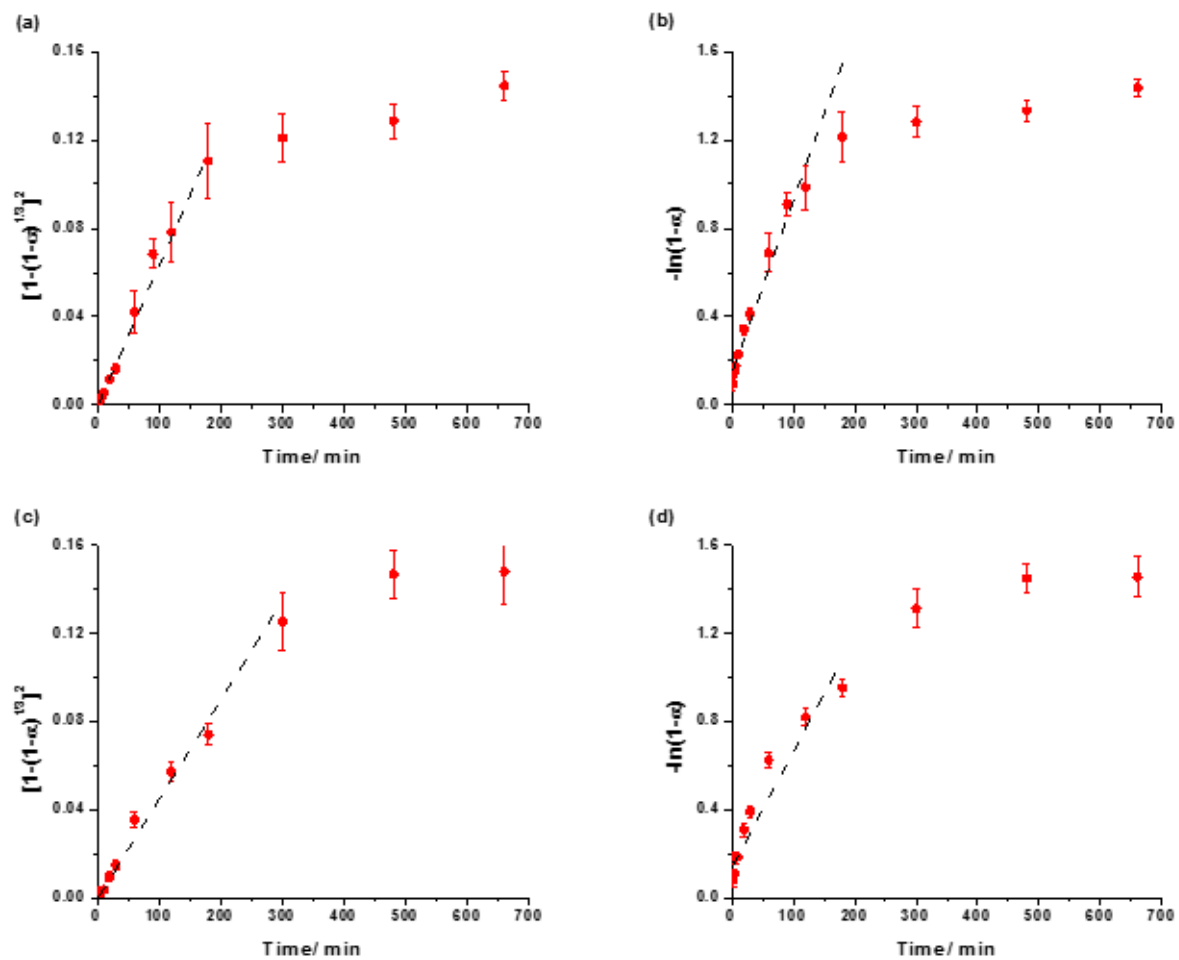

**Figure S2.** Integral fitting of resol (a,b) and FDU-16 (c, d) at 100 °C to (a,c) the Jander model and (b, d) 1<sup>st</sup> order reaction model.

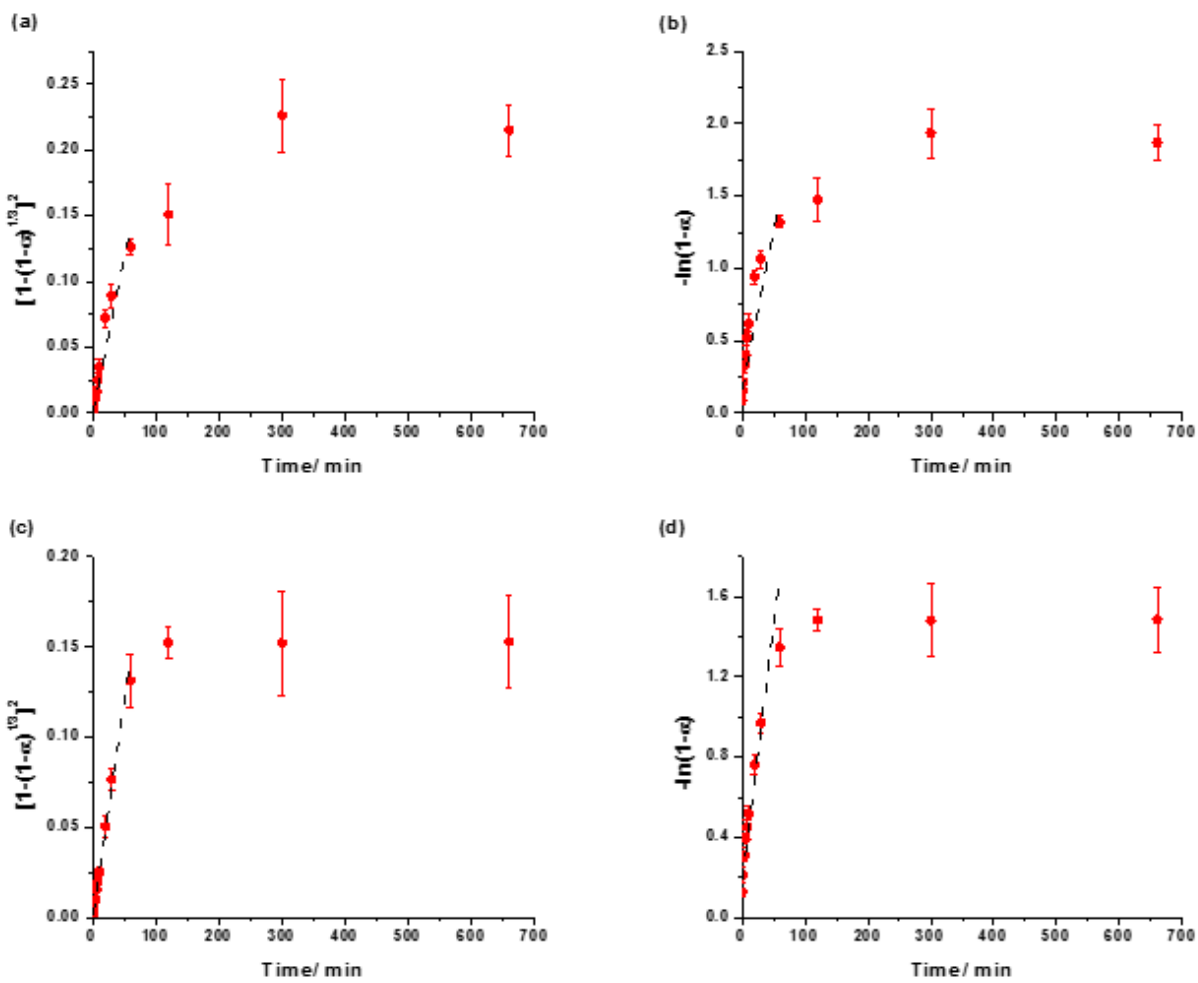

**Figure S3.** Integral fitting of resol (a,b) and FDU-16 (c, d) at 120 °C to (a,c) the Jander model and (b, d) 1<sup>st</sup> order reaction model

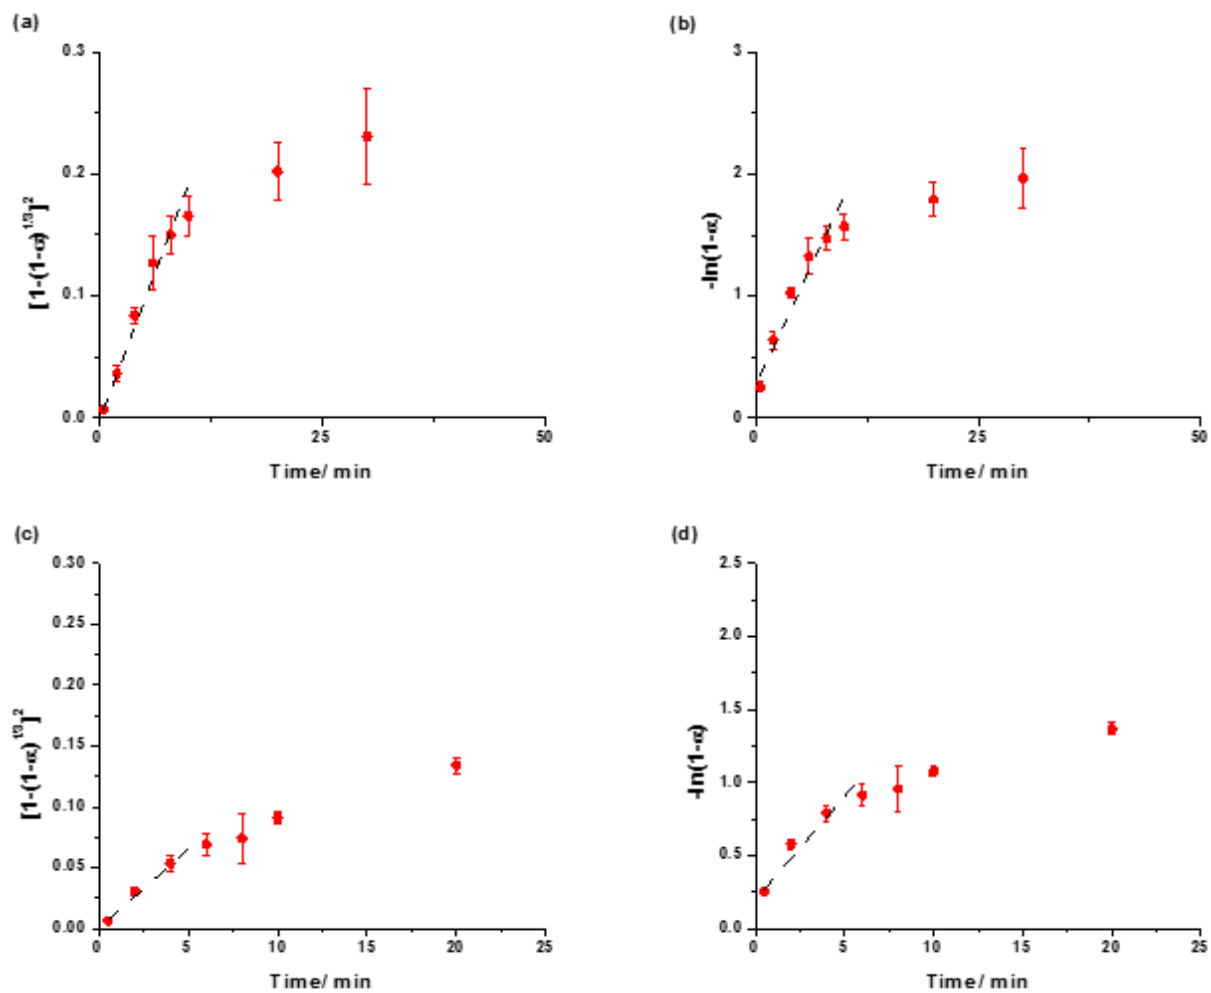

**Figure S4.** Integral fitting of resol (a,b) and FDU-16 (c, d) at 140 °C to (a,c) the Jander model and (b, d) 1<sup>st</sup> order reaction model

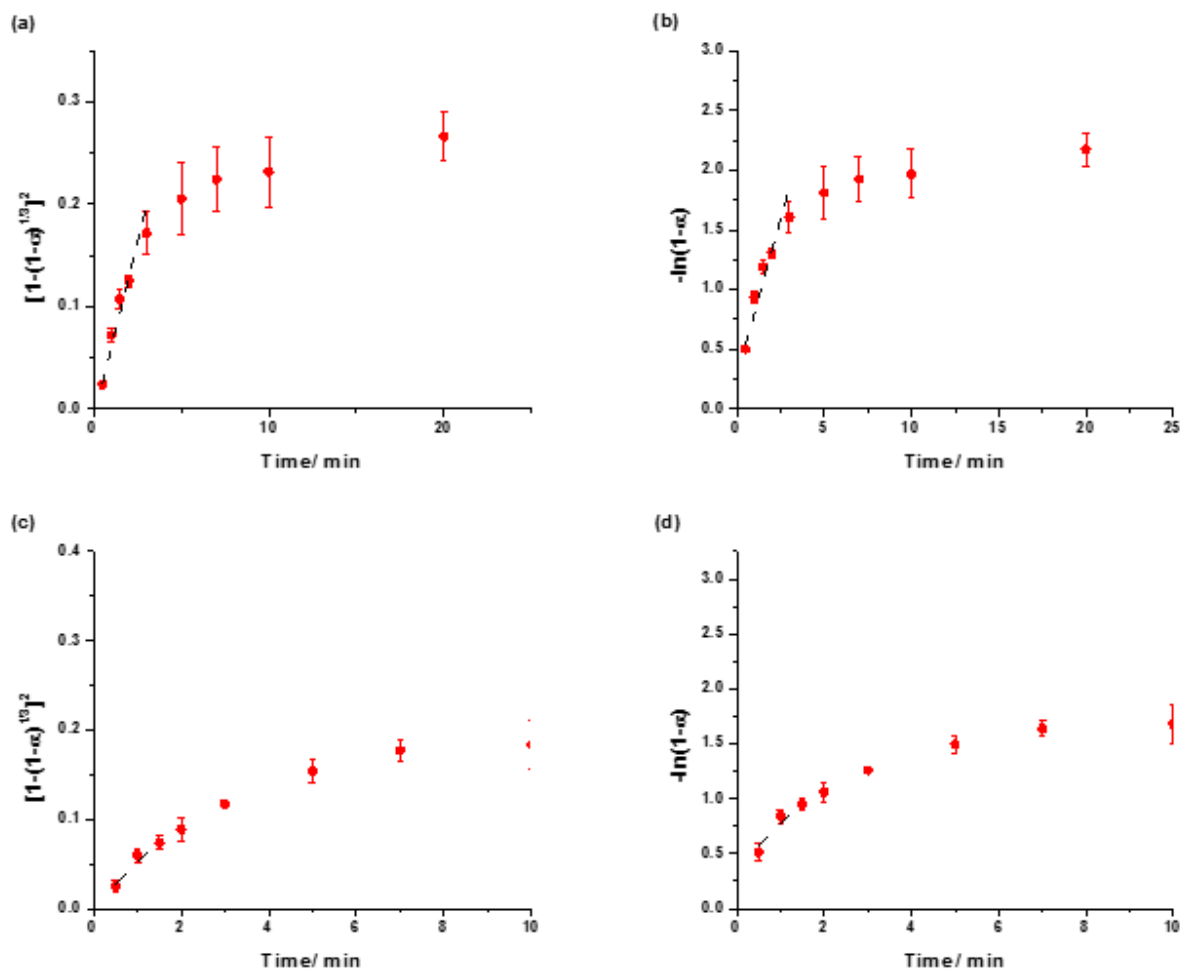

**Figure S5.** Integral fitting of resol (a,b) and FDU-16 (c, d) at 160 °C to (a,c) the Jander model and (b, d) 1<sup>st</sup> order reaction model

**Table S2.** Details of integral fitting result

|                                      | INTERCEPT              | SLOPE (rate constant) | ADJ. R <sup>2</sup> | FITTING RANGE (MAXIMUM) |
|--------------------------------------|------------------------|-----------------------|---------------------|-------------------------|
| <b>100 °C</b>                        |                        |                       |                     |                         |
| <b>RESOL (JANDER)</b>                | -6.21X10 <sup>-4</sup> | 6.38X10 <sup>-4</sup> | 0.977               | 2-180 min               |
| <b>RESOL (1<sup>ST</sup> ORDER)</b>  | 0.143                  | 0.00782               | 0.973               | 2-180 min               |
| <b>FDU-16 (JANDER)</b>               | -4.20X10 <sup>-4</sup> | 4.51X10 <sup>-4</sup> | 0.977               | 2-300 min               |
| <b>FDU-16 (1<sup>ST</sup> ORDER)</b> | 0.143                  | 0.0049                | 0.905               | 2-300 min               |
| <b>120 °C</b>                        |                        |                       |                     |                         |
| <b>RESOL (JANDER)</b>                | -2.31X10 <sup>-4</sup> | 0.00237               | 0.950               | 0.5-60 min              |
| <b>RESOL (1<sup>ST</sup> ORDER)</b>  | 0.153                  | 0.0221                | 0.868               | 0.5-60 min              |
| <b>FDU-16 (JANDER)</b>               | 4.64X10 <sup>-4</sup>  | 0.0024                | 0.995               | 0.5-60 min              |
| <b>FDU-16 (1<sup>ST</sup> ORDER)</b> | 0.179                  | 0.0254                | 0.913               | 0.5-60 min              |
| <b>140 °C</b>                        |                        |                       |                     |                         |
| <b>RESOL (JANDER)</b>                | -0.00238               | 0.0194                | 0.981               | 0.5-10 min              |
| <b>RESOL (1<sup>ST</sup> ORDER)</b>  | 0.269                  | 0.156                 | 0.914               | 0.5-10 min              |
| <b>FDU-16 (JANDER)</b>               | 3.38X10 <sup>-4</sup>  | 0.01311               | 0.971               | 0.5-6 min               |
| <b>FDU-16 (1<sup>ST</sup> ORDER)</b> | 0.198                  | 0.142                 | 0.911               | 0.5-6 min               |
| <b>160 °C</b>                        |                        |                       |                     |                         |
| <b>RESOL (JANDER)</b>                | -0.00911               | 0.06867               | 0.972               | 0.5-3 min               |
| <b>RESOL (1<sup>ST</sup> ORDER)</b>  | 0.279                  | 0.524                 | 0.940               | 0.5-3 min               |
| <b>FDU-16 (JANDER)</b>               | 0.00295                | 0.0498                | 0.971               | 0.5-1.5 min             |
| <b>FDU-16 (1<sup>ST</sup> ORDER)</b> | 0.363                  | 0.413                 | 0.800               | 0.5-1.5 min             |

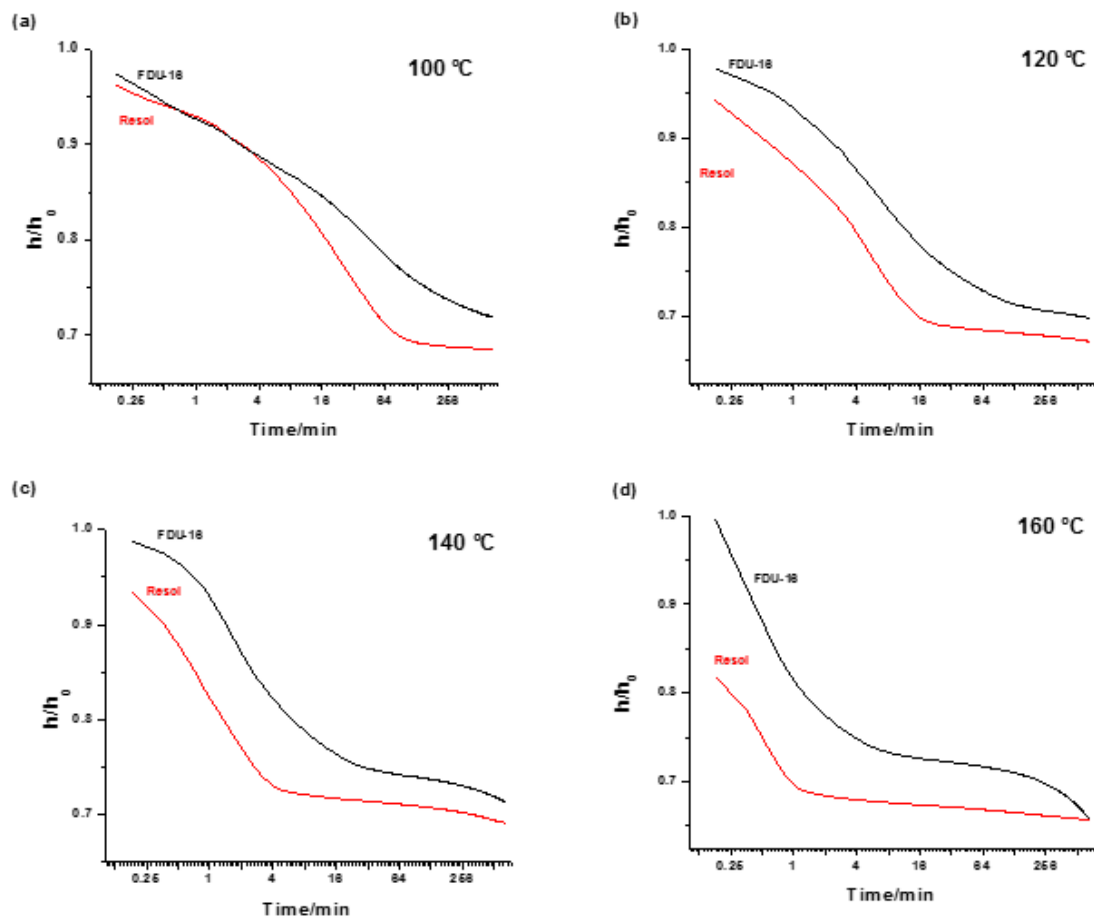

**Figure S6.** In-situ ellipsometry data of normalized film thickness at (a) 100 °C (b) 120 °C (c) 140 °C (d) 160 °C.



(a)

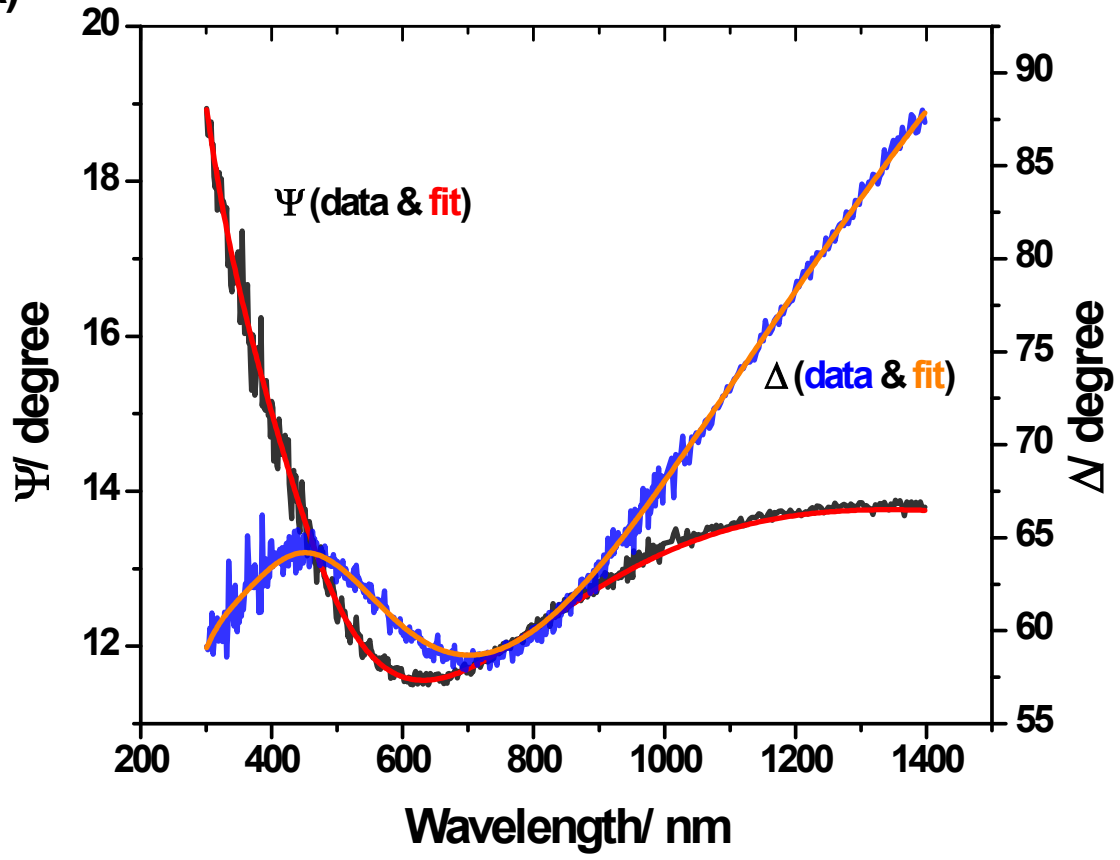

(b)

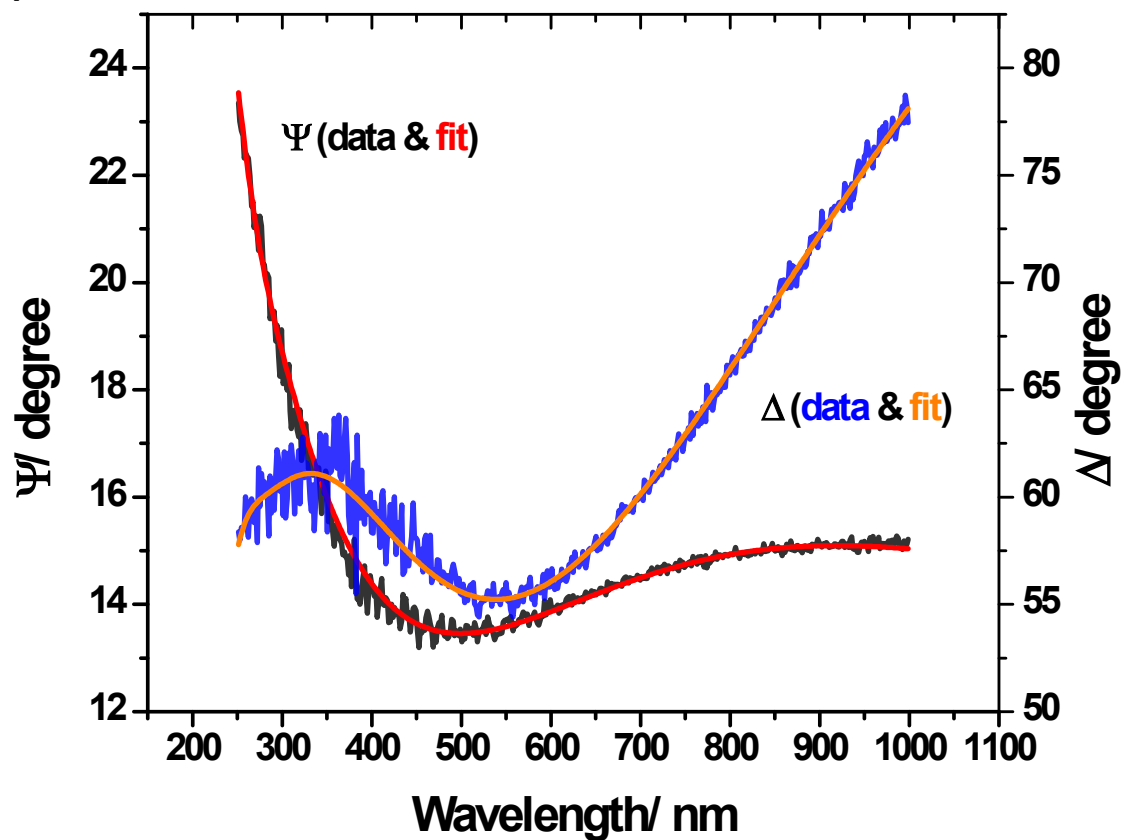

**Figure S7.** Ellipsometric angles ( $\Psi$ ,  $\Delta$ ) and fitting at incident angle of  $70^\circ$  for mesoporous carbon based on FDU-16 using (a) standard heating protocol of  $120^\circ\text{C}$  for 24 h and (b) accelerated heating of  $100^\circ\text{C}$  for 1.5 h and then  $160^\circ\text{C}$  for 1.5 h. Both films are carbonized at  $800^\circ\text{C}$ . The dashed lines indicate the recursive fit to the data.

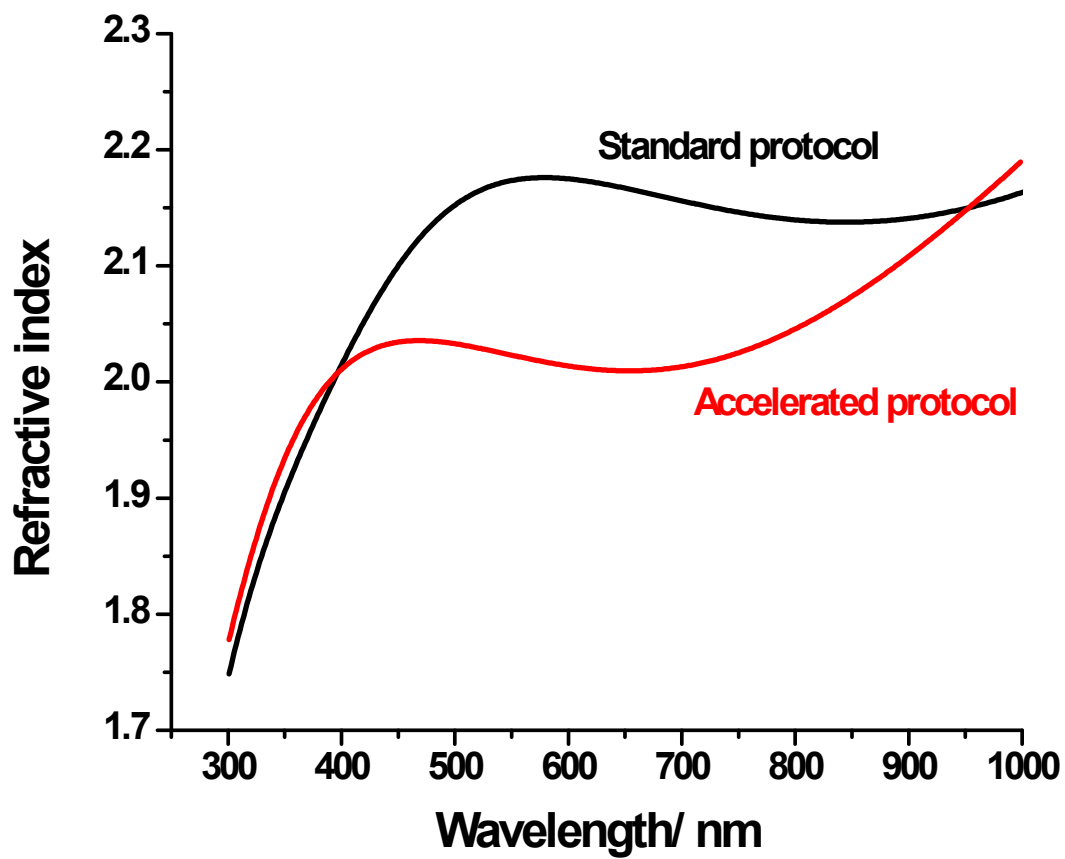

**Figure S8.** Refractive index of mesoporous carbon films as determined from ellipsometry shown in Figure S7.
